# Supplementary material for: Evaluating the performance of a web-based vehicle blind zone estimation application: Validation and policy implications
Source: Frontiers journal article supplement (doi:10.3389/ffutr.2023.1003175), 2023-04-04
Supplement: Data_Sheet_1.docx [file Data_Sheet_1.docx]

**Appendix**

**1. Vehicle information**

Make: Chevrolet

Model: Suburban

Year: 2006

VIN: 1GNFK16Z16J122490

**2. Field Measurements: Forward Seating Position**

*Vehicle measurements in inches*

| A | B | C | D |
| --- | --- | --- | --- |
| Lens height from ground | Lens to passenger window | Lens to measurement pole | Lens to front of vehicle |
| 60 | 53 | 248 | 90 |

*Nearest visible point (NVP) measurements in feet & inches at each degree increment.*

*If the driver’s view is obstructed, “N” was marked.*

*90 degrees corresponds to the driver’s line of sight when looking straight ahead. 0 degrees corresponds to the driver’s line of sight when looking out the passenger window with their head turned 90 degrees clockwise from straight ahead*

| Degree | NVP | Degree | NVP | Degree | NVP | Degree | NVP | Degree | NVP |
| --- | --- | --- | --- | --- | --- | --- | --- | --- | --- |
| 110 | 5’ 23 | 84 |  | 58 |  | 32 |  | 6 |  |
| 109 |  | 83 |  | 57 |  | 31 |  | 5 | 20’ 5 |
| 108 |  | 82 |  | 56 |  | 30 | 25’ 41 | 4 |  |
| 107 |  | 81 |  | 55 | 20’ 59 | 29 |  | 3 |  |
| 106 |  | 80 | 20 37’ | 54 |  | 28 |  | 2 |  |
| 105 | 15’ 49 | 79 |  | 53 |  | 27 |  | 1 |  |
| 104 |  | 78 |  | 52 |  | 26 |  | **[ 0 ]** | 20’ 5 |
| 103 |  | 77 |  | 51 |  | 25 | 40’ 49 | -1 |  |
| 102 |  | 76 |  | 50 | 25 | 24 |  | -2 |  |
| 101 |  | 75 | 20’ 44 | 49 |  | 23 |  | -3 |  |
| 100 | 20’ | 74 |  | 48 |  | 22 |  | -4 |  |
| 99 |  | 73 |  | 47 |  | 21 |  | -5 | 20’ 12 |
| 98 |  | 72 |  | 46 |  | 20 | 40’ 1 | -6 |  |
| 97 |  | 71 |  | **[ 45 ]** | 25’ 30 | 19 |  | -7 |  |
| 96 |  | 70 | 20’ 43 | 44 |  | 18 |  | -8 |  |
| 95 | 20 23’ | 69 |  | 43 |  | 17 |  | -9 |  |
| 94 |  | 68 |  | 42 |  | 16 |  | -10 | 20’ 15 |
| 93 |  | 67 |  | 41 |  | 15 | 40’ 1 | -11 |  |
| 92 |  | 66 |  | 40 | 25’ 31 | 14 |  | -12 |  |
| 91 |  | 65 | 20’ 54 | 39 |  | 13 |  | -13 |  |
| **[ 90 ]** | 20’ 34 | 64 |  | 38 |  | 12 |  | -14 |  |
| 89 |  | 63 |  | 37 |  | 11 |  | -15 | 20’ 21 |
| 88 |  | 62 |  | 36 |  | 10 | 20’ 8 | -16 |  |
| 87 |  | 61 |  | 35 | 25’ | 9 |  | -17 |  |
| 86 |  | 60 | 20’ 58 | 34 |  | 8 |  | -18 |  |
| 85 | 20’ 36 | 59 |  | 33 |  | 7 |  | -19 |  |

**3. Field Measurements: Standard Seating Position**

*Vehicle measurements in inches*

| A | B | C | D |
| --- | --- | --- | --- |
| Lens height from ground | Lens to passenger window | Lens to measurement pole | Lens to front of vehicle |
| 60 | 53 | 250 | 93 |

*Nearest visible point (NVP) measurements in inches at each degree increment.*

*If the driver’s view is obstructed, “N” was marked.*

*90 degrees corresponds to the driver’s line of sight when looking straight ahead. 0 degrees corresponds to the driver’s line of sight when looking out the passenger window with their head turned 90 degrees clockwise from straight ahead*

| Degree | NVP | Degree | NVP | Degree | NVP | Degree | NVP | Degree | NVP |
| --- | --- | --- | --- | --- | --- | --- | --- | --- | --- |
| 110 | 15’ 42 | 84 |  | 58 |  | 32 |  | 6 |  |
| 109 |  | 83 |  | 57 |  | 31 |  | 5 | 20’ 17 |
| 108 |  | 82 |  | 56 |  | 30 | N | 4 |  |
| 107 |  | 81 |  | 55 | 25’ 19 | 29 |  | 3 |  |
| 106 |  | 80 | 20’ 54 | 54 |  | 28 |  | 2 |  |
| 105 | 15’ 56 | 79 |  | 53 |  | 27 |  | 1 |  |
| 104 |  | 78 |  | 52 |  | 26 |  | **[ 0 ]** | 20’ 14 |
| 103 |  | 77 |  | 51 |  | 25 | N | -1 |  |
| 102 |  | 76 |  | 50 | 25’ 57 | 24 |  | -2 |  |
| 101 |  | 75 | 25’ | 49 |  | 23 |  | -3 |  |
| 100 | 20’ 11 | 74 |  | 48 |  | 22 |  | -4 |  |
| 99 |  | 73 |  | 47 |  | 21 |  | -5 | 20’ 22 |
| 98 |  | 72 |  | 46 |  | 20 | 40’ 49 | -6 |  |
| 97 |  | 71 |  | **[ 45 ]** | 25’ 53 | 19 |  | -7 |  |
| 96 |  | 70 | 25’ 12 | 44 |  | 18 |  | -8 |  |
| 95 | 20’ 33 | 69 |  | 43 |  | 17 |  | -9 |  |
| 94 |  | 68 |  | 42 |  | 16 |  | -10 | 20’ 25 |
| 93 |  | 67 |  | 41 |  | 15 | 20’ 19 | -11 |  |
| 92 |  | 66 |  | 40 | 25’ 30 | 14 |  | -12 |  |
| 91 |  | 65 | 25’ 14 | 39 |  | 13 |  | -13 |  |
| **[ 90 ]** | 20’ 51 | 64 |  | 38 |  | 12 |  | -14 |  |
| 89 |  | 63 |  | 37 |  | 11 |  | -15 | N |
| 88 |  | 62 |  | 36 |  | 10 | 20’ 20 | -16 |  |
| 87 |  | 61 |  | 35 | 25’ 52 | 9 |  | -17 |  |
| 86 |  | 60 | 25’ 18 | 34 |  | 8 |  | -18 |  |
| 85 | 20’ 52 | 59 |  | 33 |  | 7 |  | -19 |  |

**4. Field Measurements: Backward Most Seating Position**

*Vehicle measurements in inches*

| A | B | C | D |
| --- | --- | --- | --- |
| Lens height from ground | Lens to passenger window | Lens to measurement pole | Lens to front of vehicle |
| 57 | 53 | 408 | 104 |

*Nearest visible point (NVP) measurements in inches at each degree increment.*

*If the driver’s view is obstructed, “N” was marked.*

*90 degrees corresponds to the driver’s line of sight when looking straight ahead. 0 degrees corresponds to the driver’s line of sight when looking out the passenger window with their head turned 90 degrees clockwise from straight ahead*

| Degree | NVP | Degree | NVP | Degree | NVP | Degree | NVP | Degree | NVP |
| --- | --- | --- | --- | --- | --- | --- | --- | --- | --- |
| 110 | N | 84 |  | 58 |  | 32 |  | 6 |  |
| 109 |  | 83 |  | 57 |  | 31 |  | 5 | 25’ 18 |
| 108 |  | 82 |  | 56 |  | 30 | N | 4 |  |
| 107 |  | 81 |  | 55 | 35’ 93 | 29 |  | 3 |  |
| 106 |  | 80 | 40’ 22 | 54 |  | 28 |  | 2 |  |
| 105 | 30’ 12 | 79 |  | 53 |  | 27 |  | 1 |  |
| 104 |  | 78 |  | 52 |  | 26 |  | **[ 0 ]** | 25’ 9 |
| 103 |  | 77 |  | 51 |  | 25 | N | -1 |  |
| 102 |  | 76 |  | 50 | 35’ 88 | 24 |  | -2 |  |
| 101 |  | 75 | 40’ 9 | 49 |  | 23 |  | -3 |  |
| 100 | 30’ 31 | 74 |  | 48 |  | 22 |  | -4 |  |
| 99 |  | 73 |  | 47 |  | 21 |  | -5 | N |
| 98 |  | 72 |  | 46 |  | 20 | 25’ 19 | -6 |  |
| 97 |  | 71 |  | **[ 45 ]** | 35’ 24 | 19 |  | -7 |  |
| 96 | 40’ 123 | 70 | 35’ 68 | 44 |  | 18 |  | -8 |  |
| 95 |  | 69 |  | 43 |  | 17 |  | -9 |  |
| 94 |  | 68 |  | 42 |  | 16 |  | -10 | N |
| 93 |  | 67 |  | 41 |  | 15 | 25’ 16 | -11 |  |
| 92 |  | 66 |  | 40 | 35’ 39 | 14 |  | -12 |  |
| 91 |  | 65 | 35’ 33 | 39 |  | 13 |  | -13 |  |
| **[ 90 ]** | 40’ 174 | 64 |  | 38 |  | 12 |  | -14 |  |
| 89 |  | 63 |  | 37 |  | 11 |  | -15 | N |
| 88 |  | 62 |  | 36 |  | 10 | 25’ 17 | -16 |  |
| 87 |  | 61 |  | 35 | N | 9 |  | -17 |  |
| 86 |  | 60 | 35’ 59 | 34 |  | 8 |  | -18 |  |
| 85 | 40’ 132 | 59 |  | 33 |  | 7 |  | -19 |  |
